# Supplementary material
Source: publisher site journal article supplement (https://www.spandidos-publications.com/8162/downloadSupplementary)
Supplement: Supplementary file 1 [file downloadSupplementary]

**Table SI.** Morphological traits of the examined sponge specimens (corresponding images are shown separately in Figs. S2-S4).

| <b>Sample</b> | <b>Morphological Description</b>                                                                                                                                                                                                                                                                        |
|---------------|---------------------------------------------------------------------------------------------------------------------------------------------------------------------------------------------------------------------------------------------------------------------------------------------------------|
| Sponge 1      | Color: Pale white, Shape: Fig-like, lobed, Texture: Firm and leathery, Surface: Smooth, non-spiny, multi-porous, Skeleton: Compact and highly dense with a calcareous or siliceous matrix, Special Features: Multiple dermal pores and oscula; resistant to deformation.                                |
| Sponge 2      | Color: Purple-brown, Shape: Globular to spherical, Texture: Rigid, highly resilient to pressure, Surface: Spiny, hispid surface due to protruding spicules, Skeleton: Thick, compact spicule bundles giving coarse texture, Special Features: Two distinct oscula visible; surface dotted with conules. |
| Sponge 3      | Color: Light yellow to tan, Shape: Bushy with branched stalks, Texture: Compressible, soft but fibrous, Surface: Reticulated and porous, without spines, Skeleton: Loose spongin or spicule network forming polygonal meshes, Special Features: Highly branched morphology with irregular canals.       |
